# Supplementary material for: Sleep and geriatric syndromes in elderly emergency patients in China: a cross-sectional survey
Source: PeerJ. 2025 Oct 14;13:e20194. doi: 10.7717/peerj.20194 (PMC12533537; doi:10.7717/peerj.20194)
Supplement: Supplemental Information 1 [file peerj-13-20194-s001.xlsx]

## Sheet: Sheet1
No	age	sex	Marital status	Educational attainment	Residence	height(cm)	weight(kg)	BMI	Self-assessment of economic status	Self-assessment of health status	Number of comorbidities	Number of types of long-term medication	History of hospitalization within the last six months	Daily sleep time	Daytime sleepiness	Sleep quality	Use of sleeping pills	Frailty score	Sarcopenia score	Nutrition score	Cognitive function score	Number of GS
1	83	1	1	2	2	170	65	22.49	2	2	0	0	1	2	0	0	0	2	2	11	5	3
2	84	2	1	4	1	157	45	18.26	2	2	1	1	0	3	0	0	0	0	2	16	0	1
3	80	2	1	2	1	153	40	17.09	2	2	1	1	1	1	1	1	1	1	4	11	6	4
4	82	1	1	2	1	160	44	17.19	2	2	0	0	0	2	1	0	0	1	1	14	2	3
5	70	1	1	3	1	186	90	26.01	2	2	1	2	1	2	0	0	0	2	3	13	1	3
6	74	2	1	2	1	140	35	17.86	2	2	0	0	0	1	1	1	0	0	1	16	5	1
7	66	2	1	2	1	162	65	24.77	2	2	1	1	0	3	0	0	0	0	0	17	5	1
8	70	2	1	2	2	145	45	21.4	2	2	1	1	1	1	1	1	0	0	2	10	5	2
9	65	2	1	1	2	151	40	17.54	2	2	1	0	1	1	1	2	0	0	2	13	0	2
10	59	1	1	1	2	168	55	19.49	2	2	0	0	0	1	1	2	0	0	1	13	1	2
11	83	1	1	2	1	170	65	22.49	2	2	0	0	0	2	0	0	0	0	0	14	7	2
12	71	1	1	3	1	165	55	20.2	2	2	2	1	0	2	0	0	0	0	0	14	8	1
13	65	1	1	4	1	170	75	25.95	2	2	1	1	0	2	1	1	0	0	1	14	5	2
14	70	2	1	2	1	158	40	16.02	1	3	2	1	1	1	2	2	1	0	2	12	9	1
15	67	2	1	2	2	160	62	24.22	2	1	0	0	0	2	0	0	0	0	2	17	8	0
16	60	2	1	2	1	155	52.5	21.85	2	2	1	2	1	1	0	1	0	1	4	9	7	4
17	68	2	1	3	1	162	71	27.05	2	2	1	0	0	2	1	0	0	0	1	15	9	0
18	72	2	1	2	1	162	57	21.72	2	2	4	4	0	2	0	0	0	0	0	16	8	0
19	84	1	1	2	1	172	53	17.92	2	2	4	4	1	1	0	1	0	0	9	14	7	3
20	74	1	1	3	1	168	65	23.03	2	2	4	5	0	1	0	2	2	2	5	13	7	4
21	62	2	1	2	1	155	36	14.98	2	2	1	0	1	2	0	0	0	0	0	16	10	0
22	65	1	1	2	1	162	51	19.43	2	2	1	2	0	2	0	0	0	0	0	14	8	1
23	83	2	1	2	1	157	58	23.53	2	2	1	2	0	2	0	0	0	0	0	14	7	2
24	70	2	1	3	1	160	50	19.53	1	1	0	0	0	3	0	1	0	1	3	16	8	1
25	80	2	1	2	1	158	49	19.63	2	2	2	1	0	2	0	1	0	0	5	14	6	3
26	66	2	1	3	1	162	59	22.48	2	2	0	1	0	3	0	0	0	0	2.83	15	6	1
27	77	2	1	2	1	156	58	23.83	2	2	0	1	1	2	0	0	0	0	3	13	9	1
28	73	1	1	2	1	165	62	22.77	2	2	1	0	1	2	1	0	0	0	2.83	16	8	0
29	69	2	1	2	1	145	50	23.78	1	2	4	2	0	2	0	0	0	0	0	16	9	0
30	69	2	1	3	1	157	60	24.34	2	3	2	1	1	2	1	0	0	0	3	13	9	1
31	73	1	1	3	1	170	68	23.53	1	1	0	1	0	3	0	1	0	0	1	15	7	1
32	78	2	1	2	1	165	60	22.04	2	2	0	0	0	1	0	1	0	0	0	15	8	0
33	71	2	1	2	1	150	40	17.78	2	2	0	1	1	1	0	1	0	2	4	14	7	4
34	75	1	1	2	1	168	70	24.8	2	2	4	5	1	2	0	0	0	0	0	16	10	0
35	78	1	1	2	1	162	61	23.24	2	2	4	3	0	2	0	0	0	0	0	14	8	1
36	80	1	1	3	1	176	75	24.21	2	2	3	5	1	2	0	0	0	0	0	16	9	0
37	68	1	1	3	1	165	55	20.2	2	2	1	3	1	2	0	0	0	0	0	14	9	1
38	84	2	0	2	1	160	60	23.44	2	2	0	1	0	1	1	1	1	3	9	13	3	4
39	66	2	1	2	2	162	49	18.67	1	2	2	2	0	2	0	0	0	0	2	18	9	0
40	77	2	1	3	1	163	60	22.58	2	2	0	0	0	2	0	0	0	0	1	16	8	0
41	81	2	1	2	2	163	71	26.72	2	2	1	2	0	2	0	0	0	0	3	15	7	1
42	70	2	1	2	2	155	53	22.06	3	3	0	1	1	2	2	2	0	2	5	12	7	4
43	78	1	1	1	2	162	72	27.43	2	2	2	1	1	1	2	2	0	1	4	13	0	4
44	72	1	1	2	1	160	73	28.52	2	2	1	1	0	1	2	2	1	1	7	13	0	4
45	82	1	1	1	2	169	78	27.31	2	2	3	3	1	1	1	2	0	2	6	13	0	4
46	69	2	1	1	1	151	66	28.95	2	2	2	2	0	2	1	1	0	0	2	14	1	2
47	68	2	1	1	1	154	65	27.41	2	2	3	3	0	1	2	2	0	2	7	14	0	4
48	67	1	1	4	2	172	51.5	17.41	2	1	1	0	0	1	0	2	0	0	0	14	8	1
49	68	2	1	3	1	164	73	27.14	2	2	1	1	0	2	1	0	0	1	0	16	7	2
50	76	2	1	2	2	162	66	25.15	2	2	2	2	0	2	0	0	0	0	2	16	9	0
51	66	1	1	3	1	162	59	22.48	2	2	2	0	0	2	1	0	0	3	2	16	10	1
52	71	1	1	2	1	166	67	24.31	2	2	1	1	1	1	0	0	0	2	2	14	7	3
53	79	1	1	2	1	169	53	18.56	1	1	1	3	0	3	0	0	0	0	1	16	10	0
54	83	1	1	1	2	168	70	24.8	2	2	3	1	1	1	1	2	0	2	5	13	0	4
55	64	2	1	4	1	155	55	22.89	1	2	1	0	0	2	0	0	0	1	3	13	10	2
56	73	2	1	1	2	164	52	19.33	2	2	2	1	0	2	1	0	0	0	1	14	1	2
57	82	2	1	3	1	160	70	27.34	1	2	4	5	1	1	2	2	0	0	1	13	8	1
58	81	2	1	1	2	160	55	21.48	2	2	2	2	1	1	0	2	0	3	4	13	0	4
59	66	1	1	5	2	168	70	24.8	2	2	3	5	1	1	1	2	1	0	3	13	9	1
60	79	2	1	2	2	157	50	20.28	3	3	1	1	1	2	2	2	0	2	4	11	7	4
61	62	1	1	2	2	170	60	20.76	2	3	2	2	1	2	2	2	0	1	3	12	9	2
62	80	2	1	4	1	160	58	22.66	2	2	1	1	1	1	1	1	0	0	5	13	7	3
63	80	1	0	3	1	166	67	24.31	2	2	1	2	0	1	0	0	0	0	2	14	9	1
64	88	1	0	2	2	169	70	24.51	2	2	1	0	0	1	0	1	0	3	3	13	7	3
65	76	2	1	2	1	164	71	26.4	2	2	1	2	1	1	1	1	0	2	1	13	10	2
66	68	1	1	2	2	158	52	20.83	2	2	0	0	0	2	1	1	0	0	1	16	10	0
67	86	1	1	2	2	175	65	21.22	2	2	1	2	1	2	0	1	0	0	2	15	4	1
68	79	1	1	4	1	170	60	20.76	2	2	1	1	1	1	0	1	0	0	0	15	9	0
69	64	2	1	2	1	155	45	18.73	2	2	1	2	0	1	0	2	0	0	4	14	6	3
70	72	2	1	2	1	158	49	19.63	2	2	4	5	1	1	0	2	0	2	4	13	9	3
71	71	1	1	2	1	170	75	25.95	2	2	2	5	0	2	0	0	0	0	0	15	10	0
72	74	2	1	2	1	160	55	21.48	2	2	2	2	0	2	0	1	0	0	0	16	10	0
73	79	1	1	2	1	160	50	19.53	2	2	1	3	0	2	0	0	0	0	4	14	6	3
74	74	1	1	4	1	165	60	22.04	2	3	1	2	1	2	1	1	0	1	3	11	9	2
75	74	1	1	2	2	173	59	19.71	2	2	2	3	1	2	0	0	0	0	2	17	9	0
76	72	2	1	2	1	154	58	24.46	2	1	1	1	0	2	1	0	0	0	3	17	6	1
77	67	2	1	2	2	156	62	25.48	2	1	1	1	0	2	0	0	0	0	3	17	6	1
78	77	1	1	4	1	170	72	24.91	1	1	1	2	1	2	0	0	0	0	2	16	7	1
79	72	1	1	3	1	169	57	19.96	1	1	1	0	0	1	1	1	0	0	1	16	6	1
80	81	1	1	2	2	161	54	20.83	2	3	2	2	1	1	1	2	0	2	6	12	0	4
81	77	2	1	1	1	155	60	24.97	1	2	1	0	0	2	0	1	0	0	2	15	5	1
82	69	1	1	3	1				2	3	0	1	1	1	1	1	0	2	8	12	8	3
83	78	1	1	3	2	170	75	25.95	2	2	3	5	0	2	1	1	0	1	4	16	8	2
84	70	1	1	1	2	155	60	24.97	2	2	2	3	0	2	0	0	0	2	8	12	1	4
85	78	2	0	2	1	158	70	28.04	3	3	1	1	1	1	0	2	0	3	7	14	6	4
86	79	1	0	3	1	160			2	2	1	1	1	1	2	2	0	3	8	13	2	4
87	74	2	1	2	2	160	63	24.61	2	2	1	1	0	2	0	0	0	3	8	14	6	4
88	77	2	1	2	2	162	55	20.96	2	2	1	1	1	1	1	1	0	0	7	14	3	3
89	74	1	1	3	1	172	60	20.28	2	2	1	1	0	1	0	1	0	0	1	16	6	1
90	82	2	0	1	2	155	50	20.81	2	2	2	2	1	1	1	1	1	4	4	11	0	4
91	81	1	1	2	2	168	55	19.49	2	2	1	1	0	2	0	1	0	0	2	14	5	2
92	72	1	1	4	1	165	70	25.71	2	2	1	1	0	2	0	0	0	0	1	15	6	1
93	74	1	1	4	1	175	58	18.94	2	2	1	1	1	1	1	1	0	0	4	12	6	3
94	67	1	1	2	2	178	65	20.52	2	2	0	0	0	1	1	1	0	0	0	16	8	0
95	77	2	1	3	2	158	58	23.23	2	2	0	0	0	1	1	1	0	0	4	11	5	3
96	80	2	0	2	2	162	55	20.96	3	3	2	2	1	1	1	2	1	3	9	11	4	4
97	89	1	0	1	2	176	65	20.98	3	3	1	2	1	1	2	2	1	3	9	12	0	4
98	87	2	1	1	2	153	58	24.78	2	2	2	2	0	1	2	2	0	2	2.83	12	0	3
99	71	2	1	2	2	151	45	19.74	2	2	2	2	0	2	1	2	0	2	3	13	4	3
100	71	1	1	3	1	168	63	22.32	2	2	0	1	1	1	1	1	0	0	1	16	6	1
101	71	2	1	3	1	162	53	20.2	1	2	2	1	0	2	0	0	0	0	2	18	8	0
102	87	1	1	2	1	173	55	18.38	2	2	1	1	0	2	0	0	0	0	0	16	10	0
103	67	1	1	3	1	168	54	19.13	2	2	0	1	1	1	0	2	2	0	0	13	10	1
104	64	1	1	5	1	170	59	20.42	1	1	1	1	0	2	0	2	0	0	0	15	10	0
105	74	1	1	3	1	168	65	23.03	1	1	1	1	0	2	0	0	0	0	0	14	10	1
106	66	2	1	2	1	154	55	23.19	3	3	3	4	1	2	1	0	0	1	4	13	8	3
107	81	1	1	2	2	160	45	17.58	2	3	0	2	0	2	0	0	0	0	3	17	6.14	1
108	65	2	1	4	1	160	75	29.3	2	2	1	1	1	1	1	2	0	1	1	16	7	2
109	80	1	1	2	1	156	60	24.65	2	3	6	5	0	2	0	1	0	0.9	9	15	1	3
110	80	1	1	3	1	160	50	19.53	1	1	1	1	1	2	0	0	0	0	2	16	7	1
111	77	2	1	2	1	155	35	14.57	2	2	5	4	1	1	1	1	0	5	3	12	6	3
112	60	2	1	3	1	156	54	22.19	2	3	3	1	1	2	1	1	0	2	5	16	7	3
113	67	1	1	4	2	168	70	24.8	2	2	1	0	1	3	1	0	0	1	1	10	4	3
114	78	2	1	1	2	150	57	25.33	3	3	2	1	0	1	1	2	0	2	3	12	0	3
116	66	2	1	3	1	160	80	31.25	2	2	1	0	1	2	1	1	0	1	6	14	8	3
117	75	2	1	2	1	150	70	31.11	2	2	1	1	0	2	0	0	0	0	1	14	2	2
118	65	2	1	2	2	160	55	21.48	2	2	0	0	1	2	1	1	0	3	4	14	7	4
119	75	1	1	2	2	172	70	23.66	2	2	0	0	0	3	0	1	0	1	1	14	9	2
120	63	1	1	3	2	165	60	22.04	2	2	0	0	0	2	0	1	0	0	1	17	9	0
121	80	2	1	1	2	148	48	21.91	2	3	1	1	0	1	1	2	0	2	6	12	0	4
122	72	1	1	3	1	170	55	19.03	2	2	1	1	0	1	1	0	1	2	5	13	5	4
123	77	1	1	1	2	173	55	18.38	2	2	1	1	0	2	1	1	0	0	2	14	1	2
124	77	1	1	1	2	170	65	22.49	2	2	3	2	0	1	2	2	0	0	1	13	1	2
125	77	1	1	2	1	173	60	20.05	2	1	0	0	0	3	0	0	0	0	4	16	8	1
126	67	1	1	2	1	166	63	22.86	1	2	1	2	0	1	0	0	0	0	1	16	7	1
127	69	1	1	3	1	168	75	26.57	1	2	1	3	1	2	1	1	0	3	5	15	7	3
128	79	2	1	2	1	160	61	23.83	2	2	2	3	0	2	0	0	0	0	0	16	4	1
129	77	2	1	1	1	160	60	23.44	2	2	1	1	0	2	1	1	0	2	7	13	0	4
130	66	1	1	1	2	155	60	24.97	2	2	1	1	0	2	2	2	0	2	3	13	0	3
131	70	1	1	2	1	153	49	20.93	2	2	1	1	0	1	0	2	0	0	2	13	7	2
132	77	1	1	3	1	157	50	20.28	2	2	1	1	0	2	0	1	0	0	1	14	3	2
133	82	1	1	3	1	170	50	17.3	2	1	0	1	1	2	1	0	0	0	2	15	9	0
134	88	2	0	1	1	150	40	17.78	2	3	2	3	0	1	1	1	0	4	8	9	0	4
135	63	1	1	2	1	165	60	22.04	2	2	1	1	0	2	1	1	0	0	2	14	9	1
136	75	1	1	4	2	161	55	21.22	1	2	0	1	1	2	0	1	0	1	1	15	6	2
137	63	1	1	4	1	165	66	24.24	1	3	2	4	0	2	0	0	0	0.9	0	16	9	1
138	61	2	1	5	1	160	55	21.48	1	1	1	1	0	2	0	0	0	0	0	17	10	0
139	71	1	1	3	1	169	74	25.91	2	2	0	1	0	2	0	1	0	0	2	16	9	0
140	61	1	1	2	2	170	65	22.49	2	2	1	0	0	1	1	1	0	0	2	14	6	2
141	65	2	1	3	1	156	60	24.65	2	3	1	1	0	1	1	1	1	2	4	11	5	4
142	76	2	1	2	2	162	63	24.01	2	2	0	0	0	2	0	0	0	0	3	16	7	1
143	70	2	1	2	2	160	62	24.22	3	2	0	0	0	3	0	1	0	1	1	16	9	1
144	75	2	1	2	2	160	65	25.39	2	3	1	2	1	2	2	2	0	2	3	12	8	2
145	70	2	1	4	1	150	40	17.78	2	2	1	0	1	1	1	1	0	1	3	12	9	2
146	80	2	1	3	2	155	60	24.97	3	3	1	2	1	3	1	1	0	1	3	12	8	2
147	70	1	1	4	1	170	60	20.76	2	3	1	1	0	2	0	0	0	3	3	16	8	1
148	73	1	1	4	1	170	70	24.22	2	3	1	2	1	3	0	0	0	2	4	15	8	2
149	72	1	1	2	2		55		2	1	0	0	0	3	0	0	0	0	0	12	6	2
150	59	1	1	3	2	170	70	24.22	2	2	1	2	0	2	1	0	0	2	2	16	10	1
151	84	1	0	3	1	173	70	23.39	1	1	1	2	1	3	0	0	0	0	1	13	1	2
152	63	2	1	4	1	163	55	20.7	2	2	1	1	1	1	1	1	0	0	3	13	5	2
153	66	2	1	3	2	148	45	20.54	2	2	2	2	0	1	2	2	0	2	3	13	9	2
154	84	1	0	5	1	180	70	21.6	1	1	1	2	0	1	1	1	0	2	4	14	4	4
155	70	2	1	2	1	155	60	24.97	1	1	2	3	1	2	1	2	0	4	4	13	6	4
156	67	2	1	1	2	155	58.5	24.35	2	2	1	2	0	2	2	2	0	2	5	14	7	4
158	65	1	1	3	1	160	50	19.53	2	3	1	0	0	2	1	1	0	4	6	11	6	4
159	81	1	1	2	2	168	55	19.49	2	3	1	3	0	2	1	1	0	3	4	11	3	4
160	88	2	0	3	1	155			2	2	1	2	1	2	0	0	0	2	9	16	3	3
161	66	1	0	3	1	170	65	22.49	3	3	0	0	1	2	1	0	0	1	1	14	10	2
162	66	2	1	3	2	158	55	22.03	2	3	2	1	1	3	0	0	0	1	4	13	8	3
163	69	1	1	2	1	160	47	18.36	2	2	3	5	0	3	2	0	0	4	2.83	9	5	3
164	86	1	1	1	1	168	68	24.09	1	1	1	1	0	2	1	1	0	1	2	14	5	3
165	79	2	1	3	1	158	54	21.63	1	1	1	1	1	2	1	1	0	0	2.83	14	9	1
166	86	2	1	1	1	168	62	21.97	1	3	2	2	1	1	1	2	0	0	4	12	5	3
167	69	1	1	3	1	173	78	26.06	2	2	1	1	0	2	1	1	0	0	2	16	8	0
168	71	2	1	2	1	150	50	22.22	1	1	1	2	0	2	1	1	0	0	2	16	6	1
169	82	1	1	2	1	170	65	22.49	1	1	1	0	0	3	0	0	0	0	2	17	9	0
170	71	2	1	4	1	158	62	24.84	1	1	1	1	0	2	1	0	0	0	0	14	10	1
171	62	1	1	2	1	171	60	20.52	3	3	1	1	0	2	0	2	0	0	0	16	10	0
172	67	2	1	3	1	165	52	19.1	2	2	1	1	0	2	1	1	0	0	0	14	10	1
173	63	2	1	2	1	158	58	23.23	2	2	1	1	0	2	1	0	0	0	1	14	10	1
174	71	2	1	3	1	165	60	22.04	2	1	1	1	0	2	0	0	0	0	0	16	10	0
175	75	2	1	3	1	156	42	17.26	2	2	1	5	1	2	0	0	0	0	0	16	10	0
176	74	1	1	3	1	170	70	24.22	2	2	1	2	1	1	0	2	0	0	3	13	8	1
177	77	1	1	2	1	156	45	18.49	2	2	4	5	1	1	0	2	0	3	10	14	9	3
179	68	2	0	3	1	150	55	24.44	1	1	1	1	1	1	1	1	0	2	1	9	6	3
180	87	2	1	2	1	150	45	20	2	2	1	1	0	2	0	0	0	1	2	15	0	2
181	78	2	1	3	1	160	55	21.48	2	2	0	0	0	2	1	0	0	0	0	16	5	1
182	79	1	1	2	2	170	65	22.49	2	2	1	1	0	3	0	0	0	1	3	13	4	3
183	67	2	1	3	1	160	59	23.05	3	3	0	1	0	3	0	0	0	0	3	14	7	2
184	71	1	1	3	1	170	65	22.49	2	2	3	3	0	1	1	1	0	1	3	14	6	3
185	77	1	1	4	1	175	82	26.78	2	2	1	2	1	2	1	1	0	0	1	16	7	1
186	67	1	1	2	1	170	69	23.88	3	2	0	0	0	3	0	0	0	0	2	15	6	1
187	79	2	1	2	1	154	69	29.09	2	2	0	0	0	3	1	1	0	0	2	14	7	2
189	68	1	1	2	2	175	65	21.22	3	3	0	0	0	2	1	1	0	3	6	12	6	4
190	65	1	1	2	2	170	70	24.22	2	2	0	0	1	2	1	1	0	1	3	14	7	3
191	65	1	1	3	1	170	60	20.76	2	2	0	0	0	2	0	0	0	0	2.83	14	8	1
192	81	1	1	2	1	154	50	21.08	2	2	2	3	0	3	1	0	0	0	2	14	1	2
193	70	2	1	5	1	161	62	23.92	1	1	1	0	1	2	0	0	0	0.9	1	15	9	1
194	84	2	1	2	1	165			1	2	1	1	0	2	0	0	0	0	2.83	16	8	0
195	71	2	1	4	1	156	65	26.71	1	2	3	3	0	1	0	1	0	0	0	15	9	0
196	63	2	1	1	1	162	69	26.29	1	3	1	1	0	1	0	2	0	3	4	9	8	3
198	68	2	1	2	1	155	45	18.73	1	2	0	0	0	3	0	0	0	0	0	16	10	0
199	66	1	1	4	1	172	72	24.34	1	1	0	0	0	2	0	0	0	0	1	16	10	0
200	86	2	1	2	1	162	49	18.67	2	3	3	3	1	1	1	1	0	0.9	8	10	7	4
201	73	2	0	2	1	158	55	22.03	2	2	3	3	0	1	0	1	0	3	4	14	5	4
202	83	2	0	2	1	162	58	22.1	2	3	2	2	1	1	2	2	2	3	9	12	4	4
203	68	1	1	2	1	162	62	23.62	3	3	1	2	0	1	1	1	0	3	8	9	6	4
204	70	2	1	1	2	156	50	20.55	2	2	1	1	0	1	2	2	0	1	4	14	0	4
205	87	1	1	1	2	156	48	19.72	2	2	1	1	0	1	2	2	0	0	3	14	0	2
206	68	1	1	3	1	168	68	24.09	2	2	2	2	1	2	1	1	0	0	1	16	7	1
207	73	2	1	1	2	160	50	19.53	2	2	2	2	0	1	2	2	0	1	2.83	12	1	3
208	84	1	0	2	1	175	72	23.51	2	3	2	2	1	1	2	2	1	3	9	12	0	4
209	80	1	0	2	1	168	60	21.26	2	2	2	2	1	2	1	1	0	3	4	11	0	4
210	70	1	1	3	1	169	70	24.51	1	1	1	1	1	2	1	1	0	1	5	17	9	2
